# Supplementary material
Source: PubMed Central journal article supplement (PMC3057804)
Supplement: supp_M110.198127_jbc.M110.198127-1.pdf [file supp_M110.198127_jbc.M110.198127-1.pdf]

## SUPPLEMENTARY MATERIAL

Supplementary Table 1. **Whole cell amiloride sensitive current.** Whole cell amiloride sensitive inward  $\text{Na}^+$  current recorded from *Xenopus* oocytes injected with equal amounts of h. $\alpha$ -  $\beta$ - and  $\gamma$ ENaC cDNA or combinations of Wt and mutant subunits as indicated. “N” represents the number of individual oocytes studied.

*Supplementary Table 1*

| <b>Mutant</b>                 | <b>I<sub>Amit</sub> (nA)</b> | <b>S.E. (nA)</b> | <b>N</b> |
|-------------------------------|------------------------------|------------------|----------|
| Wt                            | 1660                         | 89               | 117      |
| $\alpha$ M321K                | 1091                         | 135              | 18       |
| $\alpha$ H418A                | 4085                         | 727              | 11       |
| $\beta$ N288A                 | 1980                         | 284              | 6        |
| $\beta$ N288C                 | 2726                         | 393              | 11       |
| $\beta$ N288K                 | 2828                         | 557              | 10       |
| $\beta$ R388A                 | 2894                         | 716              | 9        |
| $\gamma$ M299K                | 833                          | 199              | 13       |
| $\gamma$ M299R                | 2181                         | 607              | 6        |
| $\beta$ N288K $\gamma$ M299K  | 3051                         | 640              | 4        |
| $\beta$ N288K R388A           | 2944                         | 1038             | 9        |
| $\alpha$ H418A $\gamma$ M299K | 4167                         | 854              | 14       |
| $\alpha$ H418A $\beta$ R388A  | 7084                         | 712              | 13       |
| $\alpha$ H418A $\beta$ N288K  | 4667                         | 719              | 4        |
